# Supplementary material for: Irreversibility of T-Cell Specification: Insights from Computational Modelling of a Minimal Network Architecture
Source: PubMed Central journal article supplement (PMC4995000; doi:10.1371/journal.pone.0161260), 2016-08-23

# Notch AND TCF-1 AND dimer GATA-3

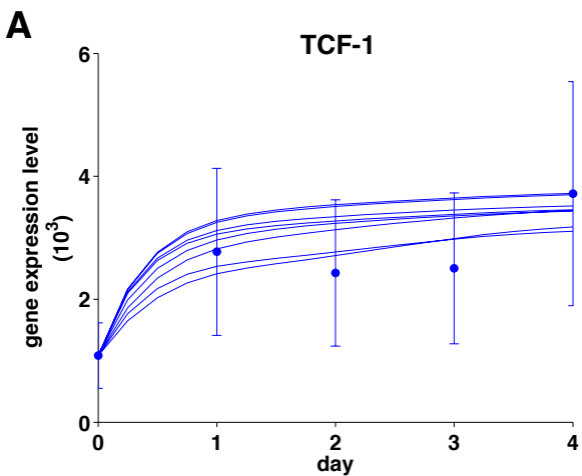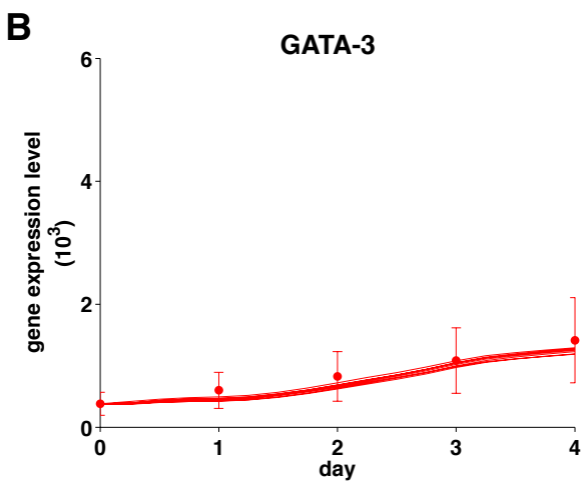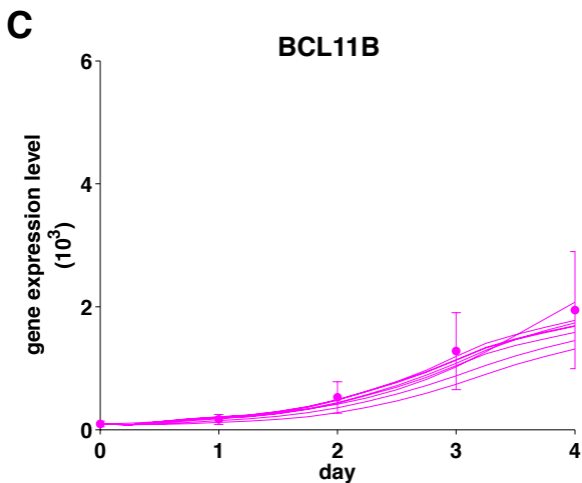

Supplement: pone.0161260.s004.pdf [file pone.0161260.s004.pdf]
